# Supplementary material
Source: Royal Society of Chemistry journal article supplement (doi:10.1039/d6nr01000h)
Supplement: d6nr01000h1.pdf [file d6nr01000h1.pdf]

# Copper-Cerium Layer Double Hydroxide as a novel tool for Melatonin Detection in Sleep Therapy Tablets

Madhu Malar Madasamy<sup>1</sup>, Sampath .M<sup>2</sup>, Jeyaraj Wilson<sup>1\*</sup>

<sup>1</sup>Polymer Electronics Lab, Department of Bioelectronics and Biosensors, Alagappa University, Karaikudi, 630 003, Tamil Nadu, India.

<sup>2</sup>Department of Physics, Syed Ammal Arts and Science College, Ramanathapuram, Tamil Nadu, India.

Corresponding authors E-mail ID: [wilson.j2008@yahoo.com](mailto:wilson.j2008@yahoo.com) (J. W)

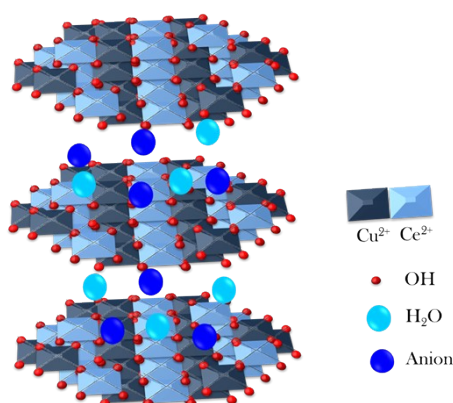

**Scheme S1: Formation of Cu-Ce LDH**

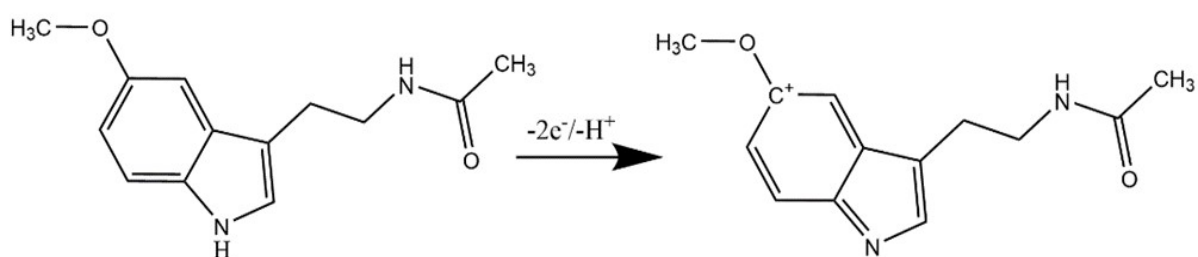

**Scheme S2: Possible mechanism of Mel in Cu-Ce LDH surface**

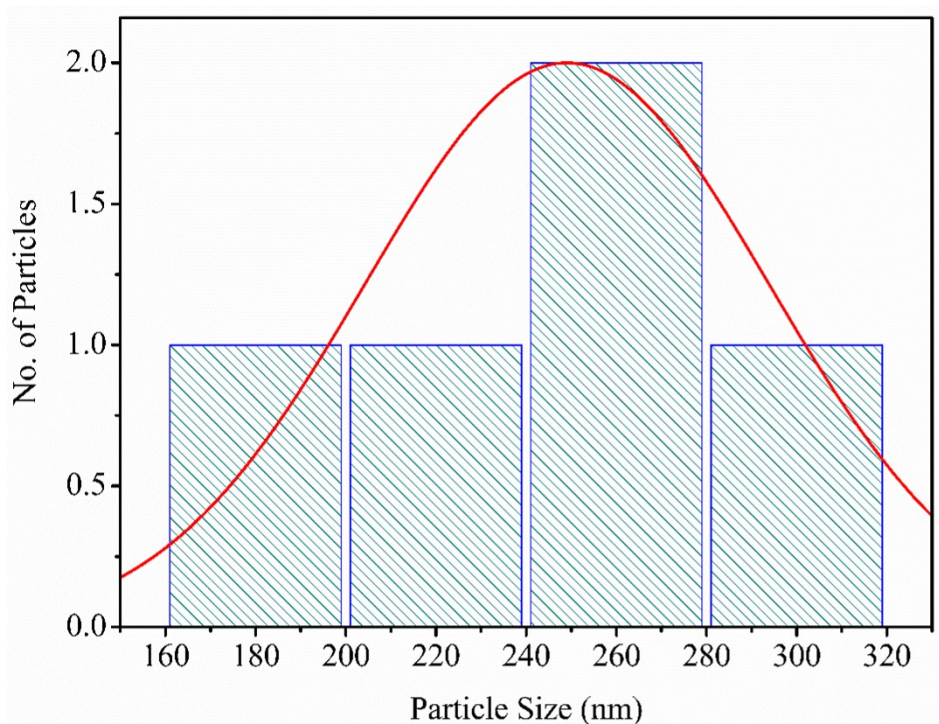

**Fig. S1 Histogram of Cu-Ce LDH**

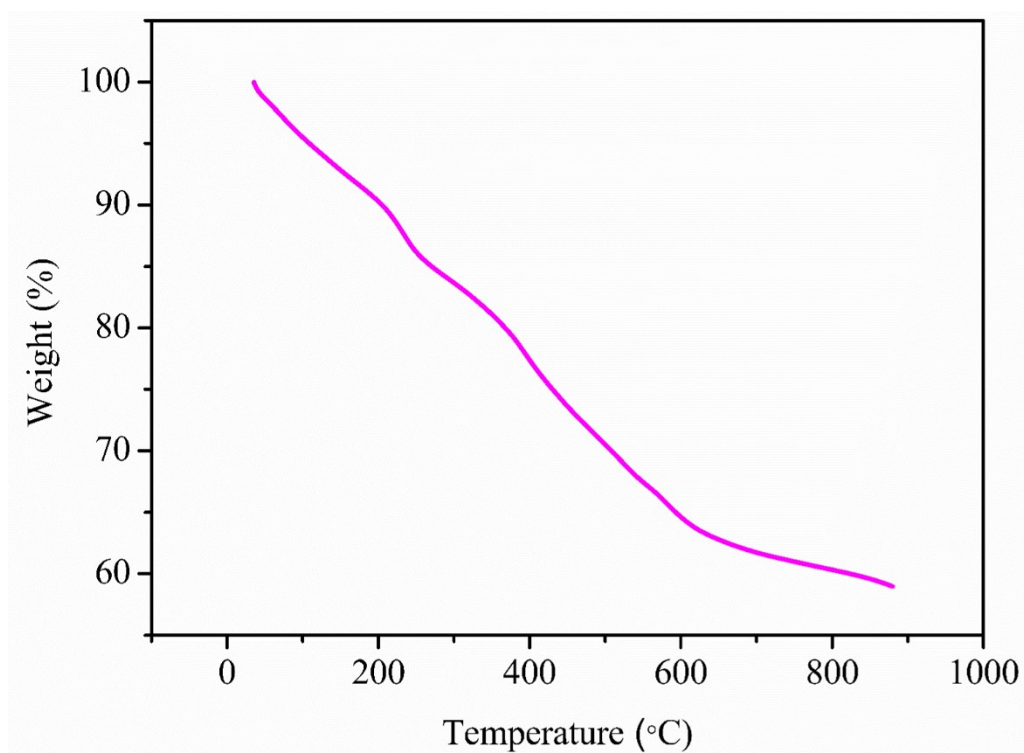

**Fig. S2 TGA of Cu-Ce LDH**

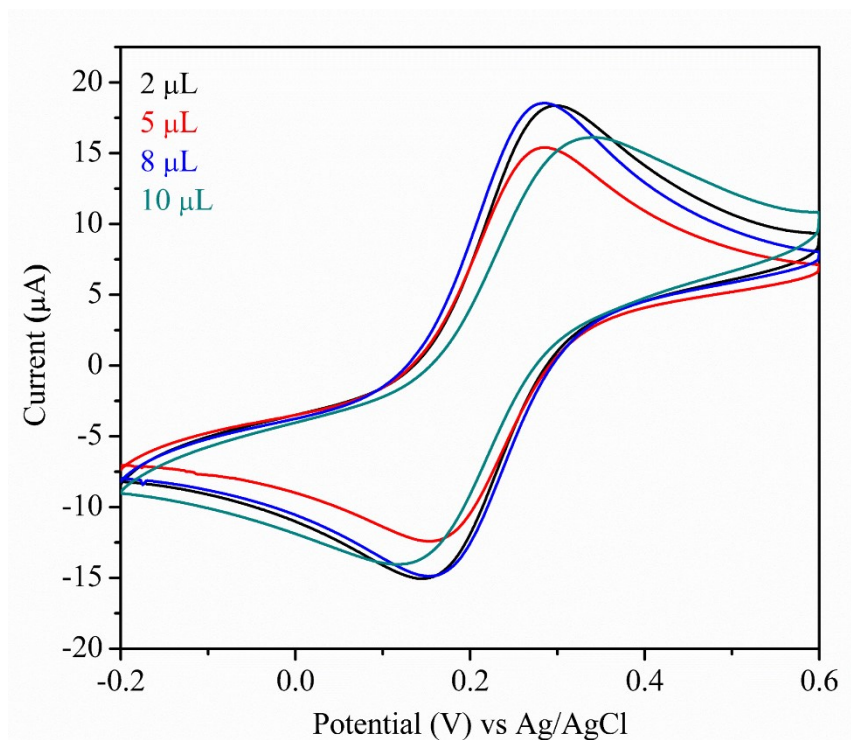

**Fig. S3 Different loading ratio of Cu-Ce LDH in 0.1 M KCl containing 1 mM [Fe (CN) $_6$ ] $^{3-/4-}$  solution.**

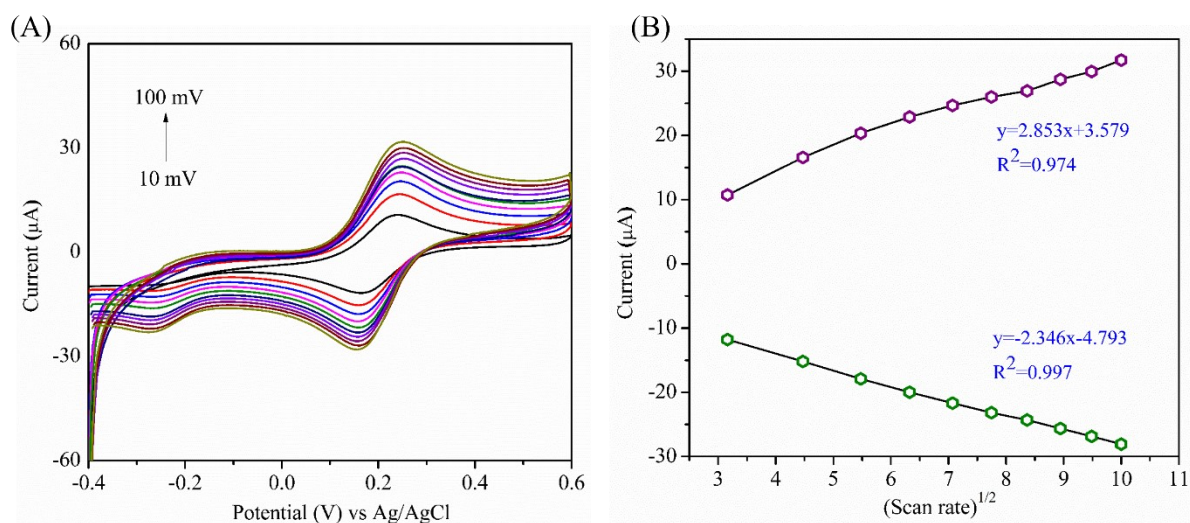

**Fig. S4 (A) CV of Cu-Ce LDH at various scan rate (10 mV–100 mV) and (B) its corresponding linear plot of Cu-Ce LDH modified GCE in 0.1 M KCl containing 1 mM [Fe (CN) $_6$ ] $^{3-/4-}$  solution.**

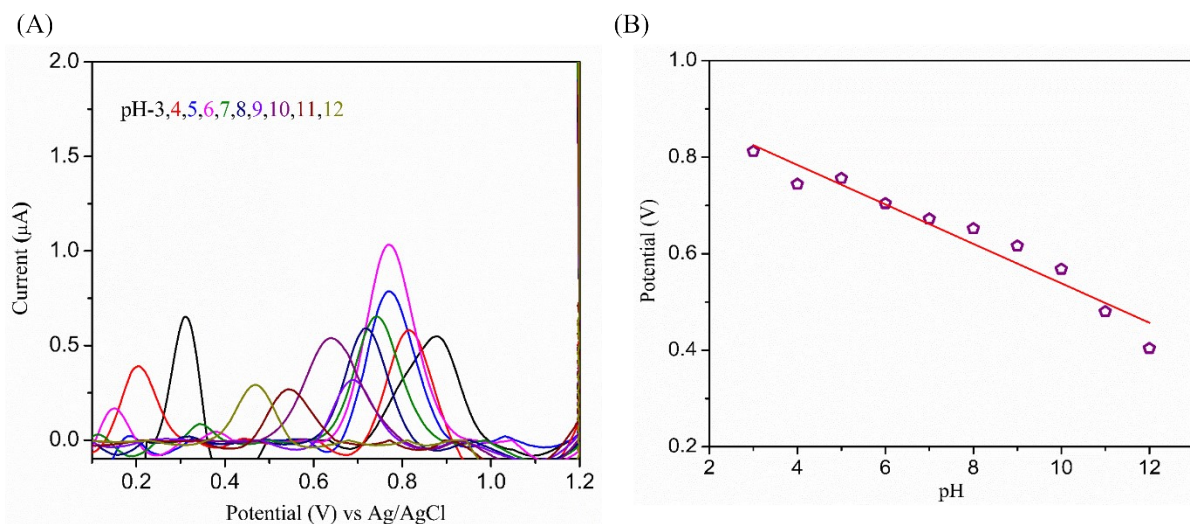

**Fig. S5 (A) Various pH of PBS using SWV electrode and (B) Linear plot for pH vs Potential of Cu-Ce LDH modified GCE.**

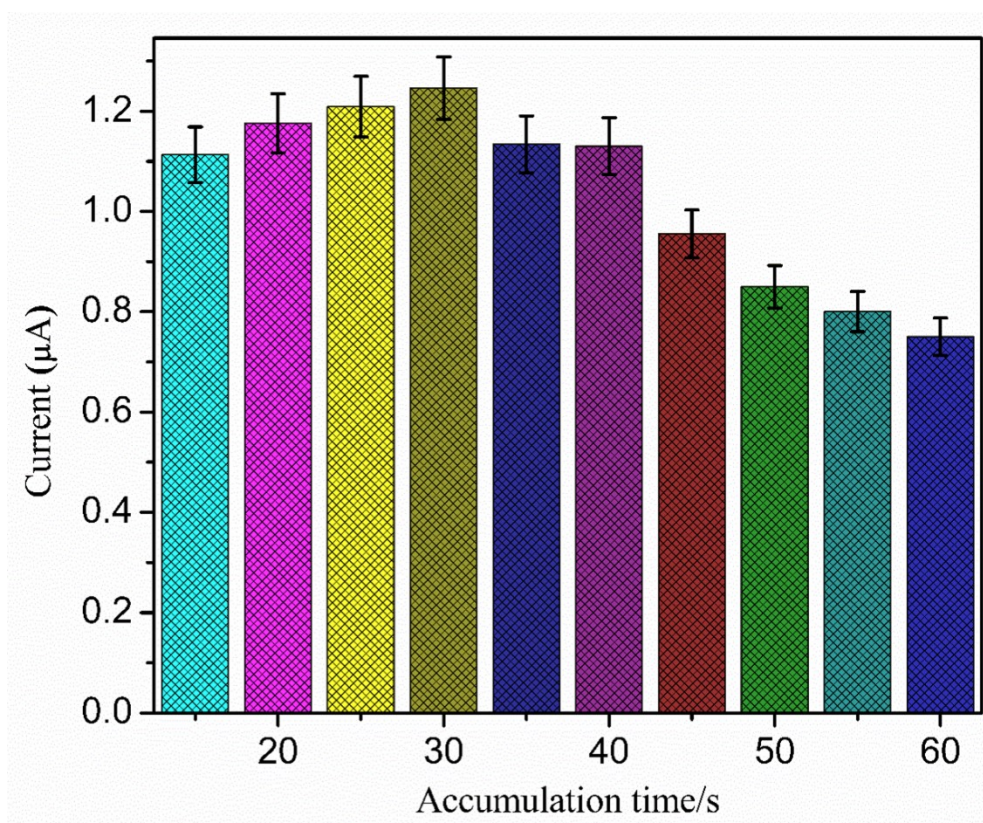

**Fig. S6 Accumulation time of Cu-Ce LDH with 100  $\mu\text{M}$  of Nizleep Pills**

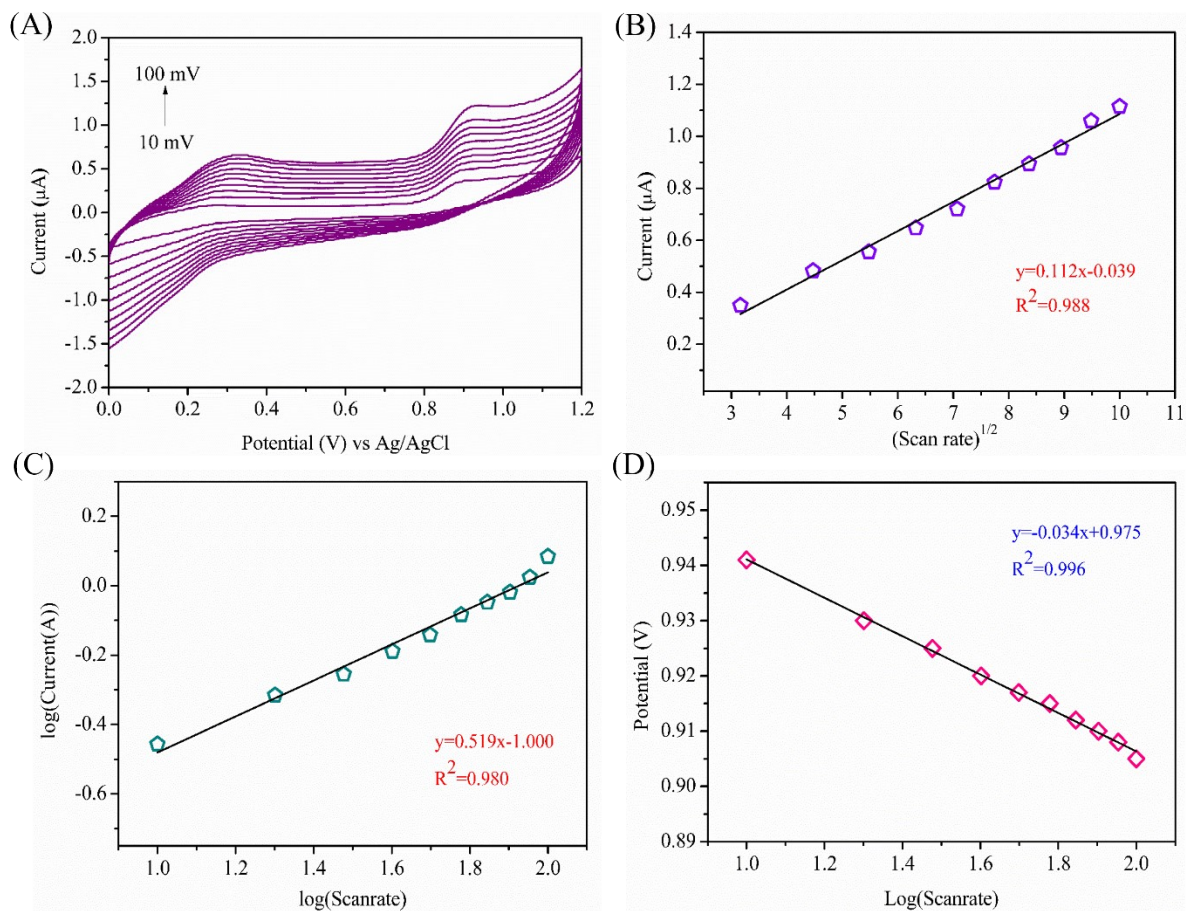

**Fig. S7 (A) Different scan rates range (10 mVs<sup>-1</sup>-100 mVs<sup>-1</sup>), (B) Linear plot of Different scan rates for the Cu-Ce LDH modified electrode, (C) Linear dependence of the logarithm of the anodic peak current on the logarithm of scan rate for Cu-Ce LDH and (D) Linear dependence of the peak potential on the logarithm of scan rate for Cu-Ce LDH.**

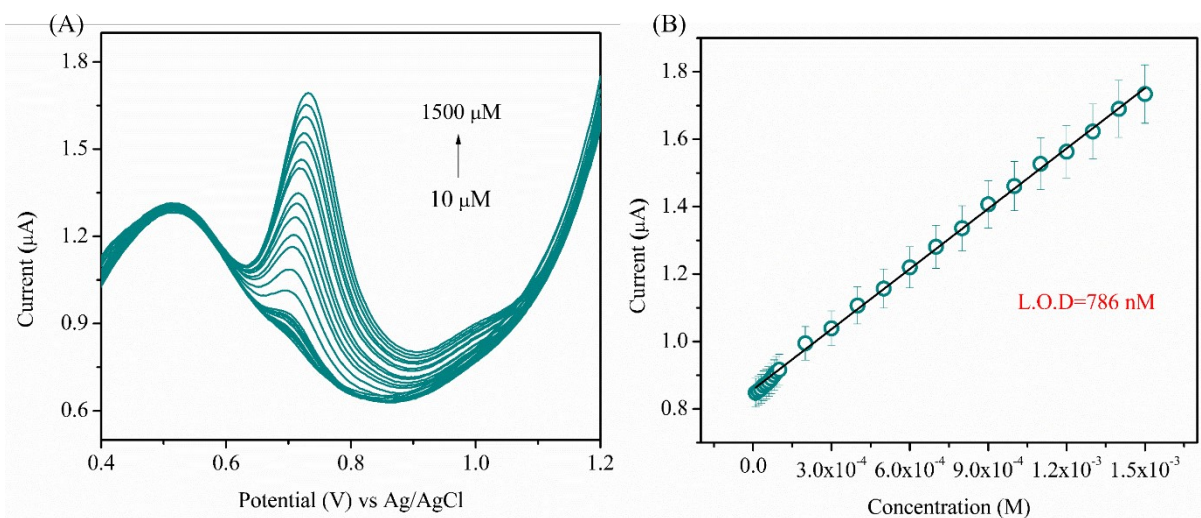

**Fig. S8 (A) SWV of the Cu-Ce LDH with varying Somelin Pills concentration (10  $\mu$ M-1500  $\mu$ M) and (B) calibration curve.**

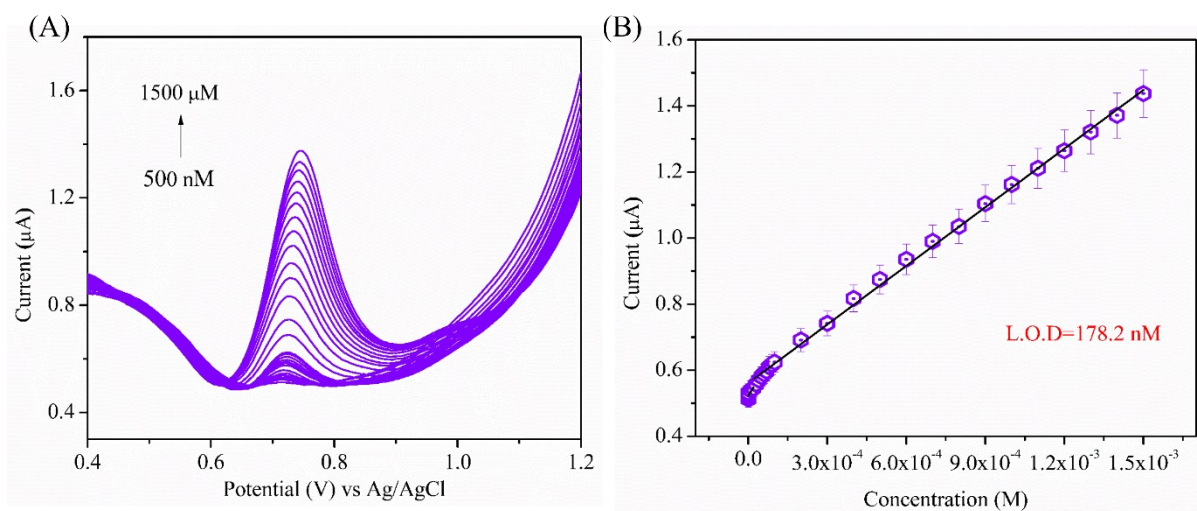

**Fig. S9 (A) SWV of the Cu-Ce LDH with varying Meloset Pills concentration (700 nM-1500  $\mu$ M) and (B) calibration curve.**
